# Supplementary material
Source: PubMed Central journal article supplement (PMC2844183)
Supplement: supp_M109.078709_jbc.M109.078709-1.pdf [file supp_M109.078709_jbc.M109.078709-1.pdf]

## Supporting information

### Supplemental figure legends

#### Fig. S1

##### **Absorption spectra of amphioxus rhodopsin Ala-269 mutants.**

**A** Absorption spectra of the purified amphioxus rhodopsin mutants A269L (red curve) and A269S (blue curve) in the dark. The absorption spectrum of WT (black dotted curve) is also shown. The  $\lambda_{\max}$  values are indicated. All the absorbances at the  $\lambda_{\max}$  were normalized to 1.0. **B** Difference absorption spectra of amphioxus rhodopsin mutants A269L (red curve) and A269S (blue curve) in the membrane preparations. The difference spectrum of WT (black dotted curve) is also shown. The  $\lambda_{\max}$  values are indicated. All the difference absorbances at the  $\lambda_{\max}$  of active states were normalized to 1.0.

#### Fig. S2

##### **Difference spectra of the amphioxus rhodopsin L208A/A269L mutant.**

The normalized difference spectra of parapinopsin WT (black), A269L (red) and L208A/A269L (green) in the membrane preparations are shown. All the difference absorbances at the  $\lambda_{\max}$  of active states were normalized to 1.0. It should be noted that the spectrum of L208A/A269L is different in shape at the shorter wavelengths region from that of the WT, indicating that subsequent L208A mutation does mostly but not completely recover the spectral properties of active state of amphioxus rhodopsin. The

spectra of WT and A269L mutant are the same as those in supplemental Fig. S1B.

### **Fig. S3**

#### **Absorption spectra of the purified paraporinopsin mutants in the dark.**

The absorption spectra of WT (black), the mutants A269L (red), F208A (orange), F208A/A269L (green), F212C (turquoise) and F212C/A269L (blue) are shown. The  $\lambda_{\max}$  of these mutants are the same as that of WT. All the absorbances at the  $\lambda_{\max}$  were normalized to 1.0.

### **Fig. S4**

#### **Absorption spectra of the Ala-269 mutant of bovine rhodopsin.**

**A** Meta-I-rich difference absorption spectra of the difference spectra of bovine rhodopsin WT (curve 1), F208A (curve 2), and F212A (curve 3). **B** Meta-I-rich difference spectra of bovine rhodopsin WT (curve 1), A269L (curve 2), F208A/A269L (curve 3) and F212A/A269L (curve 4). All the difference absorbances at the positive peaks were normalized to 1.0, and all spectra were obtained under the conditions stabilizing meta-I by using membrane preparations.

### **Fig. S5**

#### **Comparison of amino acid residues at positions 208 and 269 in various rhodopsins.**

Phylogenetic relationships of rhodopsins are schematically represented. Note that Leu-269 is conserved among long wave length absorbing type Gq-coupled rhodopsins,

and these rhodopsins have small amino acids at position 208 (indicated by box in contrast).

Table S1

## Opsin shifts of parapinopsin and amphioxus rhodopsin

| Parapinopsin |                          |                                          |                          |                                          | Amphioxus rhodopsin |                          |                                          |                          |                                          |
|--------------|--------------------------|------------------------------------------|--------------------------|------------------------------------------|---------------------|--------------------------|------------------------------------------|--------------------------|------------------------------------------|
| mutation     | dark state               |                                          | photoproduct             |                                          | mutation            | dark state               |                                          | photoproduct             |                                          |
|              | $\lambda_{\max}$<br>(nm) | opsin<br>shift*1<br>( $\text{cm}^{-1}$ ) | $\lambda_{\max}$<br>(nm) | opsin<br>shift*1<br>( $\text{cm}^{-1}$ ) |                     | $\lambda_{\max}$<br>(nm) | opsin<br>shift*1<br>( $\text{cm}^{-1}$ ) | $\lambda_{\max}$<br>(nm) | opsin<br>shift*1<br>( $\text{cm}^{-1}$ ) |
| WT           | 363                      | 0                                        | 493                      | 0                                        | WT                  | 485                      | 0                                        | 551                      | 0                                        |
| A118L        | ND*3                     | ND*3                                     | ND*3                     | ND*3                                     | F118A               | 471                      | -610                                     | 549                      | -70                                      |
| A118S        | 365                      | +150                                     | 498                      | +200                                     | F118Y               | 486                      | +40                                      | 552                      | +100                                     |
| G121A        | 364                      | +80                                      | 490                      | -120                                     | A121L               | 486                      | +40                                      | 556                      | +160                                     |
| G121S        | 369                      | +450                                     | 496                      | +120                                     | A121S               | 479                      | -260                                     | 554                      | +100                                     |
| I122A        | 368                      | +370                                     | 491                      | -80                                      | L122A               | 480                      | -210                                     | 551                      | 0                                        |
| I122E        | 364                      | +80                                      | 491                      | -80                                      | L122E               | 482                      | -130                                     | 552                      | +30                                      |
| Y207A        | ND*3                     | ND*3                                     | ND*3                     | ND*3                                     | V207A               | 485                      | 0                                        | 548                      | -100                                     |
| Y207F        | 363                      | 0                                        | 489                      | -170                                     | V207E               | 485                      | 0                                        | 553                      | +70                                      |
| C211A        | 364                      | +80                                      | 490                      | -120                                     | V211A               | 487                      | +80                                      | 552                      | +30                                      |
| C211S        | 364                      | +80                                      | 493                      | 0                                        | V211E               | 487                      | +80                                      | 552                      | +30                                      |
| F212C        | 364                      | +80                                      | 491                      | -80                                      | Y212A               | 483                      | -90                                      | 551                      | 0                                        |
| F212Y        | 365                      | +150                                     | 492                      | -40                                      | Y212F               | 484                      | -40                                      | 551                      | 0                                        |
| F261A        | 364                      | +80                                      | 502                      | +360                                     | F261A               | 482                      | -130                                     | 549                      | -70                                      |
| F261Y        | 364                      | +80                                      | 492                      | -40                                      | F261Y               | 491                      | +250                                     | 552                      | +30                                      |
| W265L        | ND*3                     | ND*3                                     | ND*3                     | ND*3                                     | W265L               | 464                      | -930                                     | 521                      | -1050                                    |
| W265F        | 363                      | 0                                        | 485                      | -330                                     | W265F               | 468                      | -750                                     | 534                      | -580                                     |
| Y268A        | ND*3                     | ND*3                                     | ND*3                     | ND*3                                     | Y268A               | 481                      | -170                                     | 541                      | -340                                     |
| Y268F        | 363                      | 0                                        | 479                      | -590                                     | Y268F               | 485                      | 0                                        | 545                      | -200                                     |
| A269L        | 363                      | 0                                        | 471                      | -950                                     | A269L               | 485                      | 0                                        | *2                       | *2                                       |
| A269S        | 363                      | 0                                        | 496                      | +120                                     | A269S               | 488                      | +130                                     | 553                      | +70                                      |

\*1 To clarify the data, plus and minus values represent red-shift and blue-shift values, respectively.

\*2 Spectral properties of the photoproduct of the A269L mutant of amphioxus rhodopsin is quite different from that of WT (see Fig. S1B).

\*3 These mutants were expressed to very low level and the  $\lambda_{\max}$  values could not be determined.

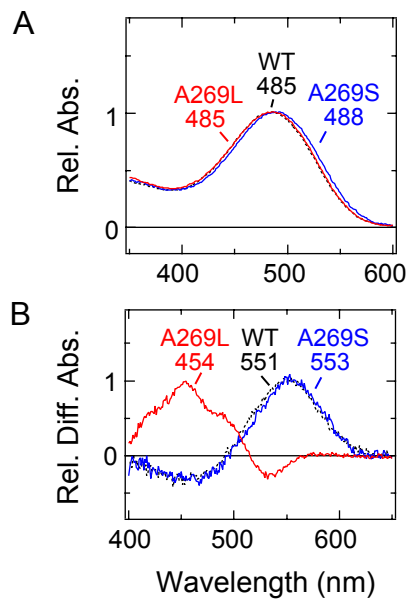

**Fig. S1 Tsukamoto et al.**

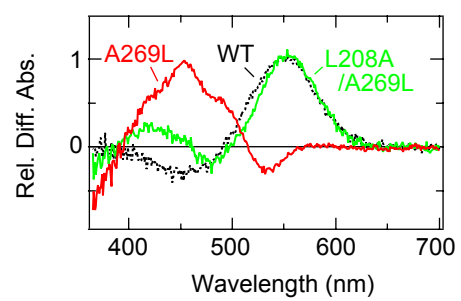

Fig. S2 Tsukamoto et al.

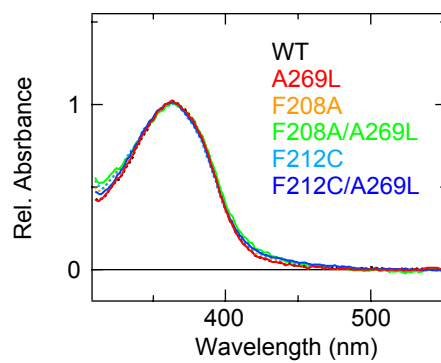

**Fig. S3 Tsukamoto et al.**

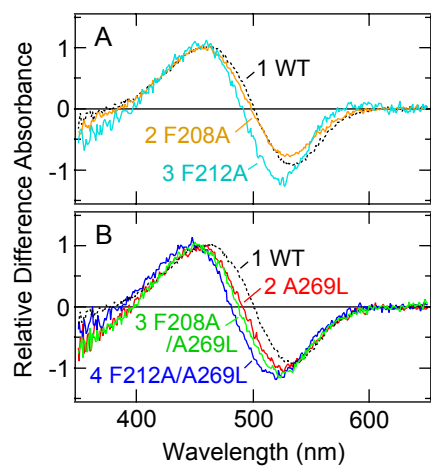

Fig. S4 Tsukamoto et al.



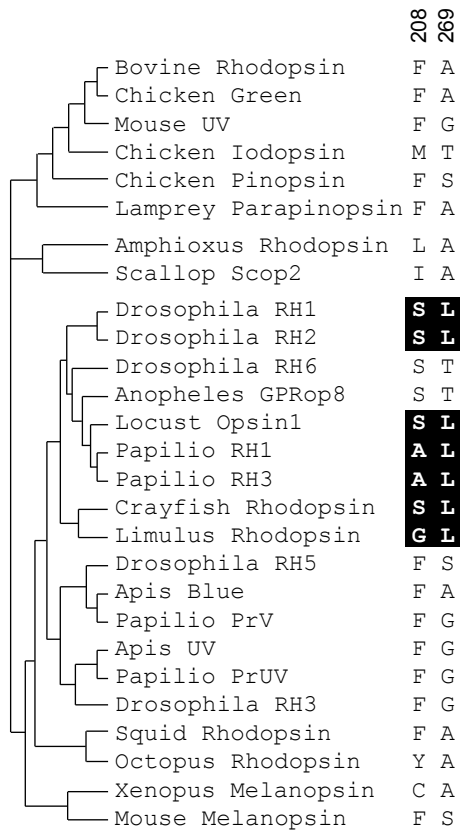

Fig. S5 Tsukamoto et al.
